# Supplementary material for: New insights on the ESIPT process based on solid-state data and state-of-the-art computational methods
Source: Royal Society of Chemistry journal article supplement (doi:10.1039/d0cp05502f), 2020-12-14
Supplement: d0cp05502f1.pdf [file d0cp05502f1.pdf]

## **New insights on the ESIPT process based on solid-state data and state-of-the-art computational methods**

Jean Nunes Laner,<sup>1</sup> Henrique de Castro Silva Junior,<sup>2,\*</sup> Fabiano Severo Rodembusch,<sup>3</sup>  
Eduardo Ceretta Moreira<sup>1,\*</sup>

<sup>1</sup>PPCEM - Fundação Universidade Federal do Pampa, Bagé - RS, Brazil

<sup>2</sup>Departamento de Química – Universidade Federal Fluminense, Niterói - RJ, Brazil

<sup>3</sup>Grupo de Pesquisa em Fotoquímica Orgânica Aplicada. Instituto de Química (UFRGS), Av. Bento Gonçalves, 9500, CEP 91501-970. Porto Alegre-RS, Brazil.

\*Corresponding authors: [eduardomoreira@unipampa.edu.br](mailto:eduardomoreira@unipampa.edu.br), [henriquecsj@id.uff.br](mailto:henriquecsj@id.uff.br)

**Table S1.** Number of papers (as of September 2020) found on Google Scholar as a combination of the term “ESIPT” + a “keyword”:

| <b>Keyword</b>     | <b># of papers combined with the keyword "ESIPT"</b> |
|--------------------|------------------------------------------------------|
| DFT                | 3650                                                 |
| B3LYP              | 2690                                                 |
| TPSS               | 59                                                   |
| M06-2X             | 182                                                  |
| CASSCF             | 372                                                  |
| CCSD(T)            | 74                                                   |
| def2               | 93                                                   |
| 6-31G              | 1620                                                 |
| Molecular Dynamics | 905                                                  |

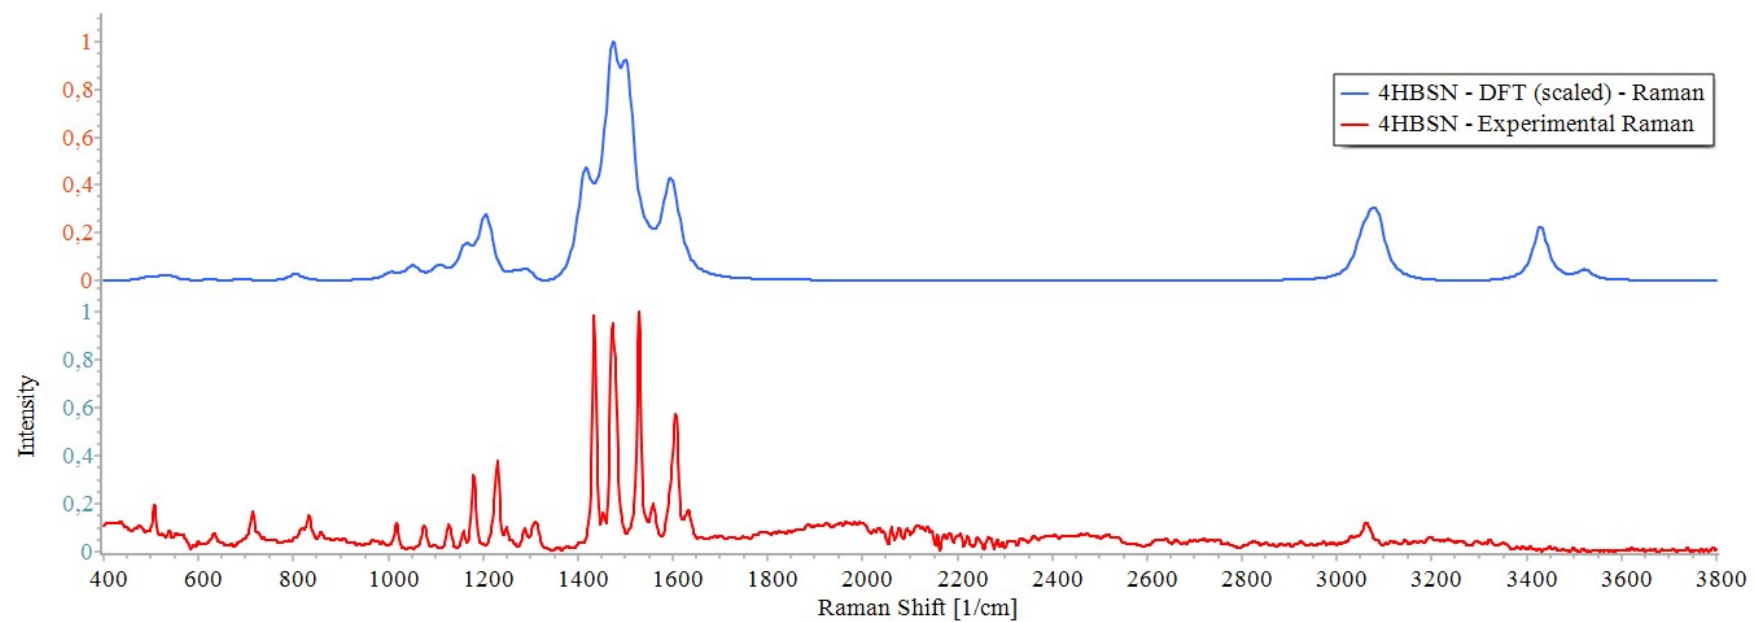

**Figure S1.** FT-Raman and DFT Raman spectra of the **4HBSN**.

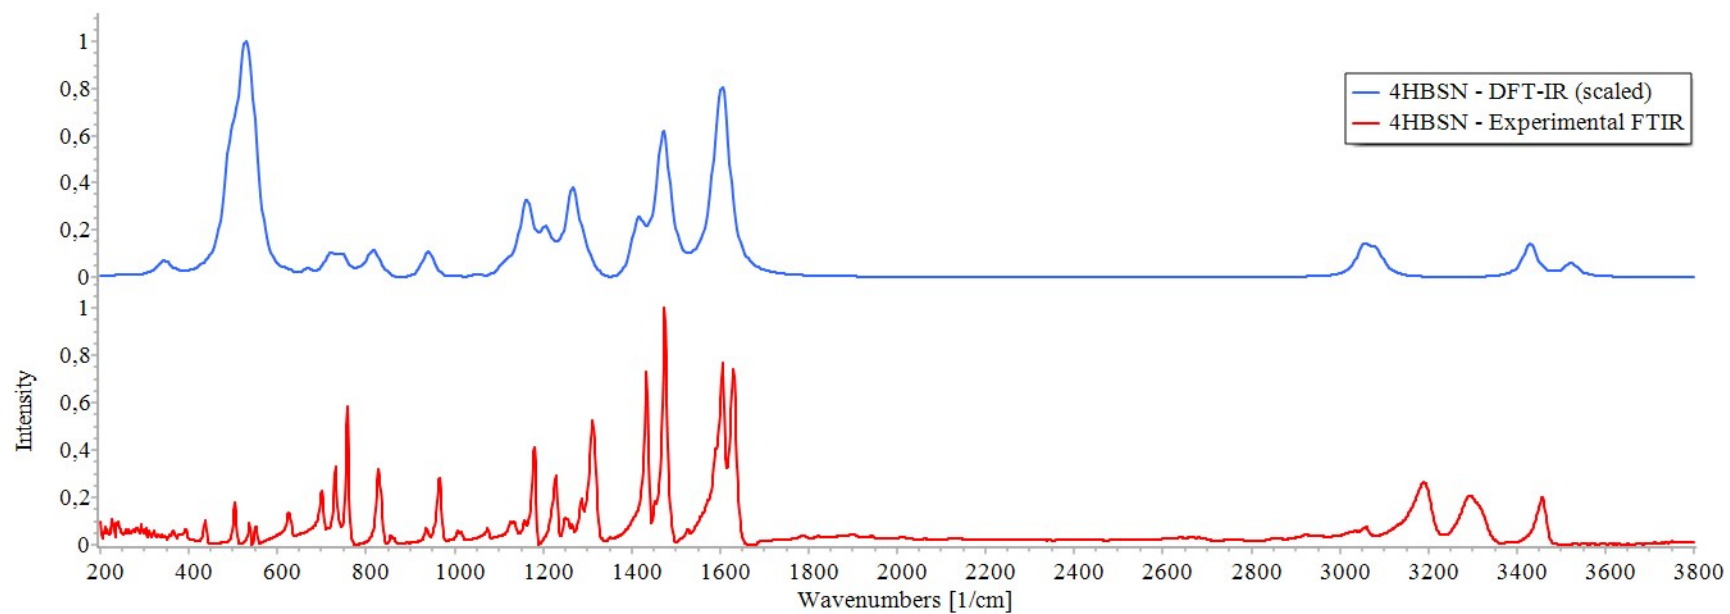

**Figure S2.** FT-IR and DFT IR spectra of the **4HBSN**.

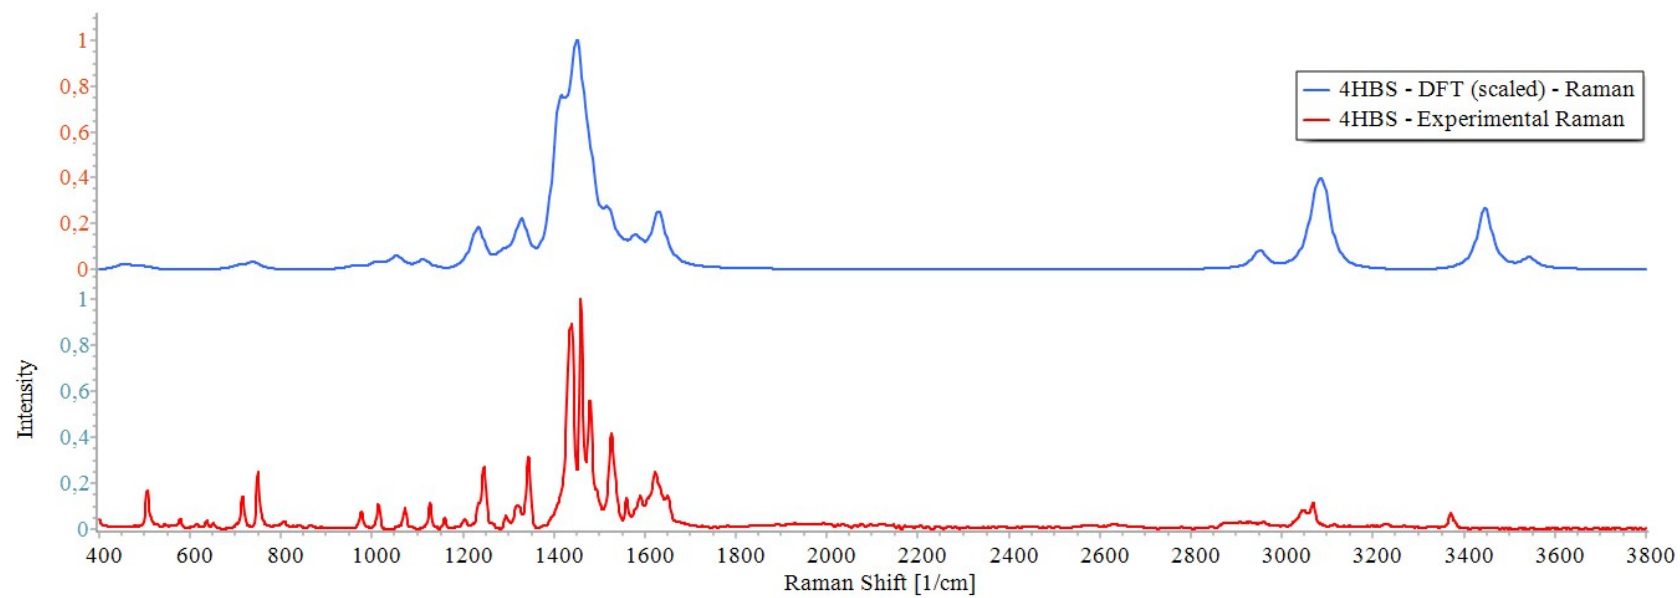

**Figure S3.** FT-Raman and DFT Raman spectra of the **4HBS**.

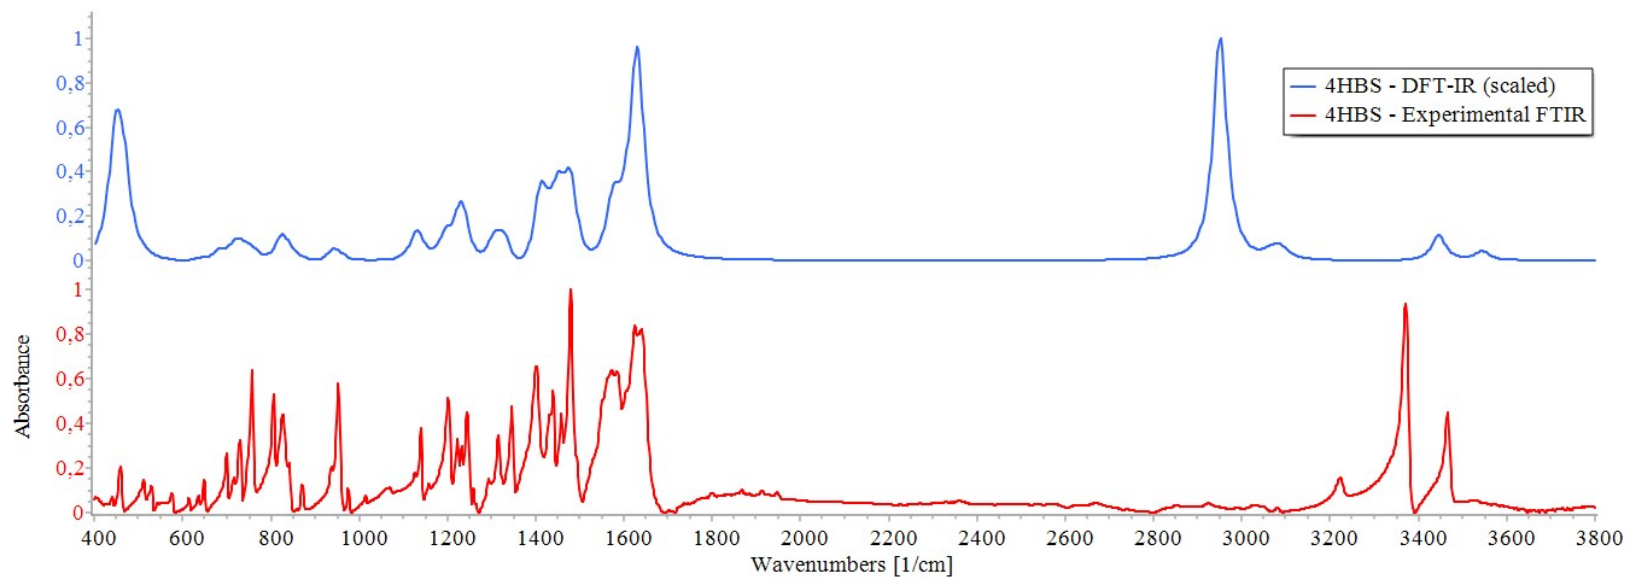

**Figure S4.** FT-IR and DFT IR spectra of the **4HBS**.
